# Supplementary material
Source: PubMed Central journal article supplement (PMC7053436)

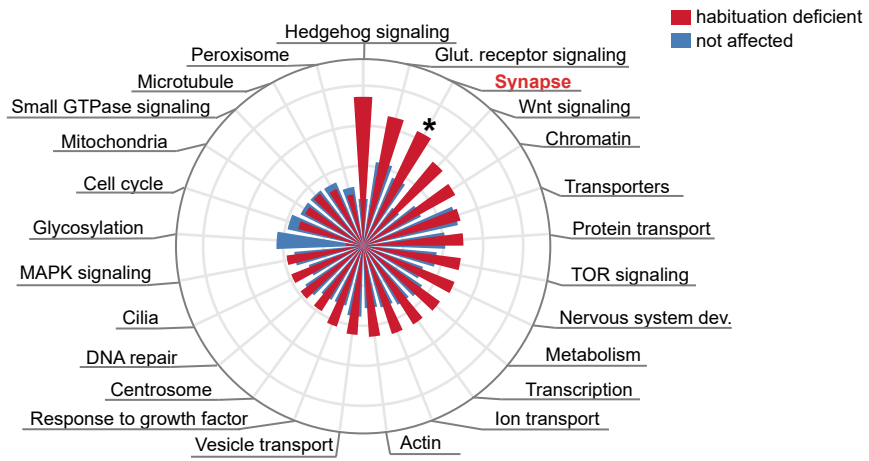

Supplement: NIHMS1548822-supplement-1.pdf [file NIHMS1548822-supplement-1.pdf]
